# Supplementary material
Source: Springer Nature journal article supplement (https://www.springermedizin.de/resource/supplementary/12883_2008_226_MOESM2_ESM.pdf/9457114)
Supplement: MOESM2 [file 9457114]

change score on the psychological scale proxy

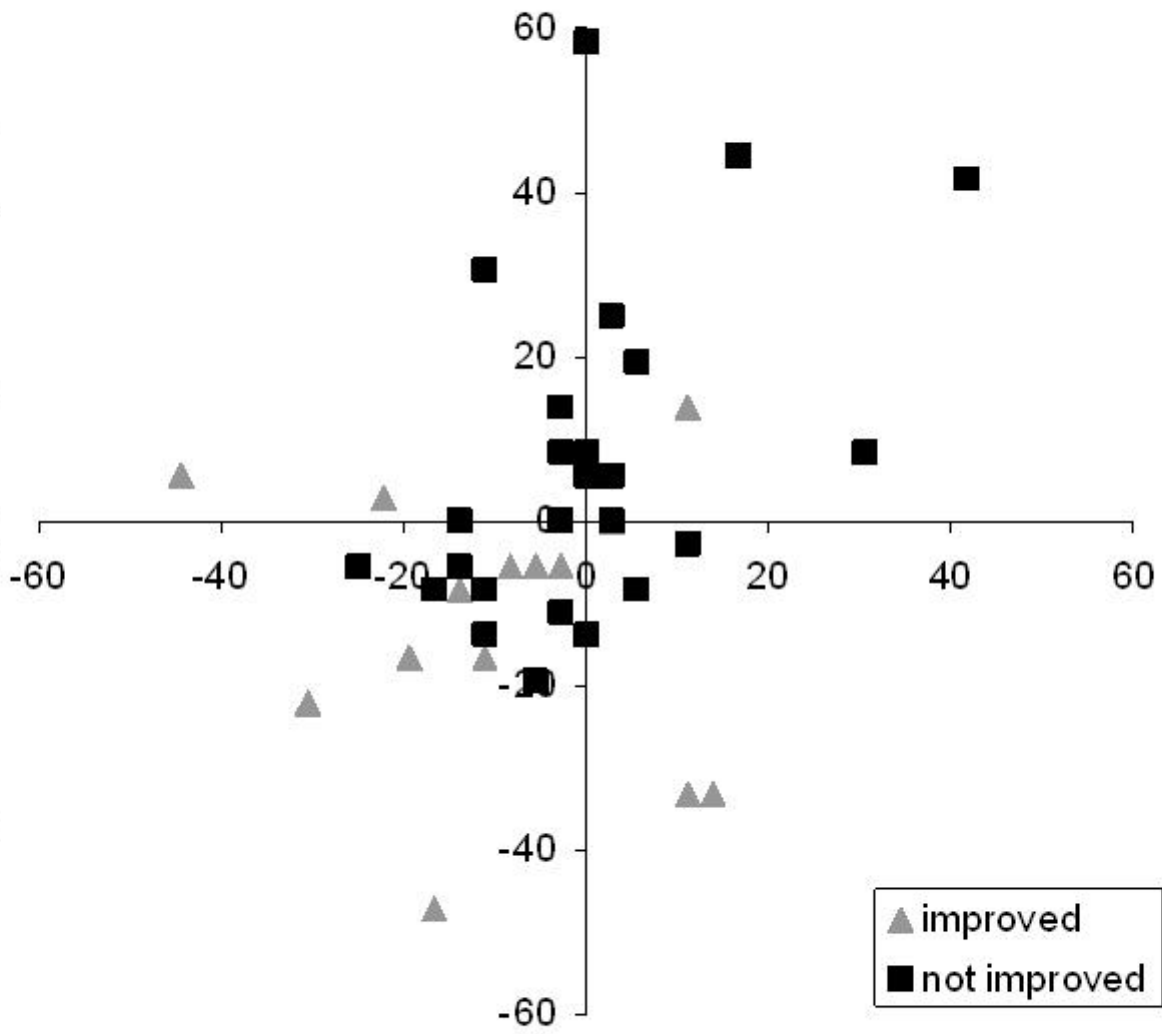

change score on the psychological scale patient

▲ improved  
■ not improved
